# Supplementary material for: Fate of a novel strobilurin fungicide pyraoxystrobin in flooded soil
Source: Royal Society of Chemistry journal article supplement (doi:10.1039/c3em00706e), 2014-01-01
Supplement: c3em00706e1.pdf [file c3em00706e1.pdf]

1     **Supplementary Information**

2             **Fate of a novel strobilurin fungicide pyraoxystrobin in flooded soil**

3

4     Tilong Yang<sup>†</sup>, Chao Xu<sup>†</sup>, Xunyue Liu<sup>†</sup>, Xia Chen<sup>†</sup>, Jianbo Zhang<sup>†</sup>, Xingcheng Ding<sup>\*†</sup>

5     <sup>†</sup>Institute of Nuclear Agricultural Sciences, Key Laboratory of Nuclear Agricultural

6     Sciences of Ministry of Agriculture, Zhejiang University, Hangzhou 310029, China

7

8

9

10

11

12

13

14

15

16

---

\* Corresponding Author: Institute of Nuclear Agricultural Sciences, Zhejiang

University, Kaixuan Road No. 268, Hangzhou 310029, Zhejiang Province, China;

Phone: +86-571-86971201; Fax: +86-571-86971421;

E-mail: [dingxch@zju.edu.cn](mailto:dingxch@zju.edu.cn)

17 Text S1 Details of High Performance Liquid Chromatography (HPLC) analysis  
18 The Waters 2695 multisolvent delivery unit includes a Waters 2998 photodiode  
19 array (PDA) detector (Waters, Milford, MA,U.S.A.) at 254 nm and a Diamonsil C<sub>18</sub>  
20 column (5µm, 250×4.6 mm, Dikma Technologies, Lake Forest, CA, U.S.A.) with a  
21 C<sub>18</sub> protection column (5 µm, 30×4.6 mm, Dikma Technologies). The column  
22 temperature was maintained at 25 °C. The HPLC condition was shown in table S1.

23

24 Table S1 HPLC conditions used in the quantification of pyraoxystrobin

| Elutiontime | Flow(mL/min) | A%  | B% |
|-------------|--------------|-----|----|
| 0           | 1.00         | 20  | 80 |
| 20          | 1.00         | 75  | 25 |
| 60          | 1.00         | 75  | 25 |
| 65          | 1.00         | 100 | 0  |
| 70          | 1.00         | 100 | 0  |
| 75          | 1.00         | 20  | 80 |
| 80          | 1.00         | 20  | 80 |

25 The letter A represents methanol + 0.1% acetic acid.

26 The letter B represents H<sub>2</sub>O + 0.1% acetic acid.

27

28

29

30

31

32

33

34

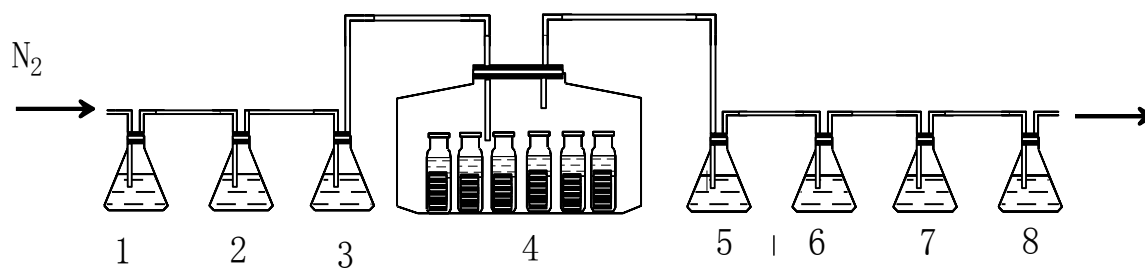

35

36 Fig. S1 Flow-through apparatus for studying the dissipation of pyraoxystrobin in

37 flooded soils. 1-2: 0.5M NaOH 3: Water 4: Vacuum desiccator 5: Ethylene

38 glycol 6:  $H_2SO_4$  (50%) 7-8: 0.2M NaOH

39

40

41

42

43

44

45

46

47

48

49

50

51

52

53

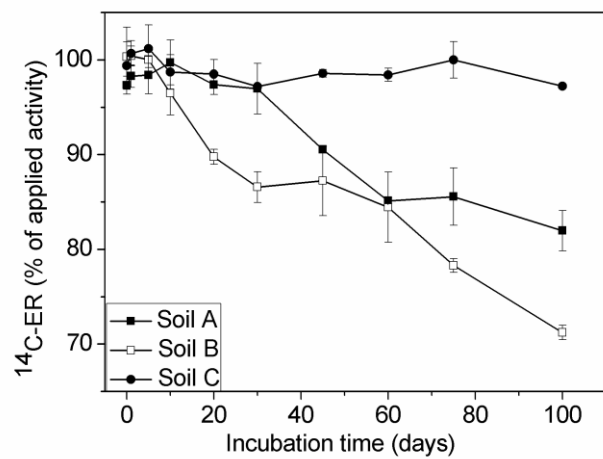

54

55 Fig. S2 Loss of extractable residues in flooded soils treated with

56  $^{14}\text{C}$ -pyraoxystrobin.

57

58

59

60

61

62

63

64

65

66

67

68

69

70

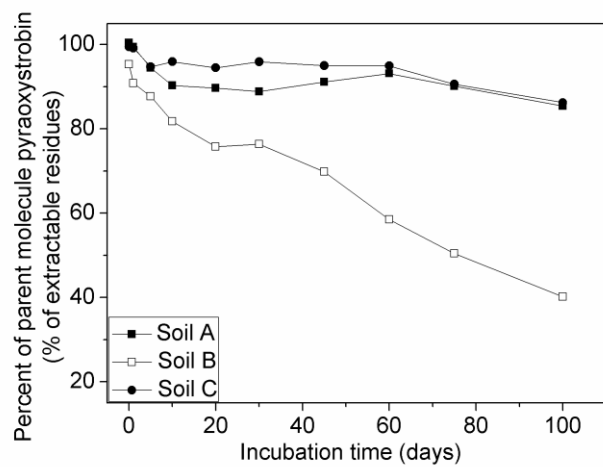

71

72 Fig. S3 Distribution of pyraoxystrobin as a percentage of extractable residues in  
73 flooded soils over the incubation period.

74

75

76
